# Supplementary material for: Antidepressant effects of sulforaphane (SFN) and its derivatives SLL-III-9 and SLL-III-120 and their potential underlying mechanisms based on the microbiota–gut–brain axis
Source: Royal Society of Chemistry journal article supplement (doi:10.1039/d3fo05278h), 2024-01-01

## Supporting Information

### **Antidepressant effects of Sulforaphane (SFN) and its derivatives SLL-III-9 and SLL-III-120 and their potential underlying mechanisms based on the microbiota-gut-brain axis**

Lili Chen,<sup>abc</sup> Huihui Cao,<sup>a</sup> Xin Zhang,<sup>a</sup> Xintong Du,<sup>a</sup> Yang Guan,<sup>a</sup> Mei Li,<sup>a</sup> Alan K Chang,<sup>d</sup> Xianran He,<sup>e</sup> Xiaolong Li<sup>f</sup> and Xiuli Bi<sup>\*ab</sup>

#### **Affiliations**

<sup>a</sup>*College of Life Science, Liaoning University, Shenyang, 110036, China*

<sup>b</sup>*Shenyang Key Laboratory of Chronic Disease Occurrence and Nutrition Intervention, College of Life Sciences, Liaoning University, Shenyang, 110036, China.*

<sup>c</sup>*College of Mathematics and Statistics, Liaoning University, Shenyang, 110036, China*

<sup>d</sup>*College of Life and Environmental Sciences, Wenzhou University, Wenzhou 325035, China*

<sup>e</sup>*Institute for Interdisciplinary Research, Jiangnan University, Wuhan Economic and Technological Development Zone, Wuhan 430056, China*

<sup>f</sup>*Shenzhen Fushan Biological Technology Co., Ltd, Kexing Science Park A1 1005, Nanshan Zone, Shenzhen 518057, China*

#### **\*Corresponding Author**

Xiuli Bi, Ph.D

Professor

College of Life Science, Liaoning University, Shenyang

66 Chongshan Road, Shenyang, 110036, P. R. China.

Tel: +86-24-62202232

E-mail address: [xiulibi@lnu.edu.cn](mailto:xiulibi@lnu.edu.cn); [xiulibi@gmail.com](mailto:xiulibi@gmail.com)

Figure S1. <sup>1</sup>H NMR of SLL-III-9.

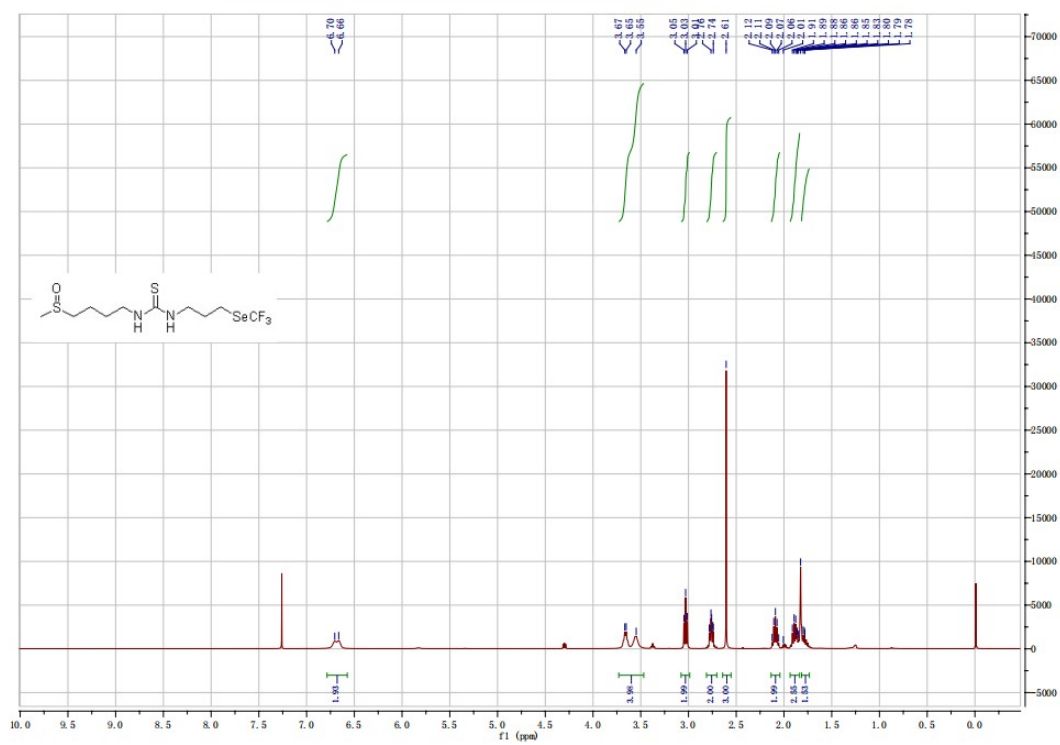

Figure S2.  $^1\text{H}$  NMR of SLL-III-120.

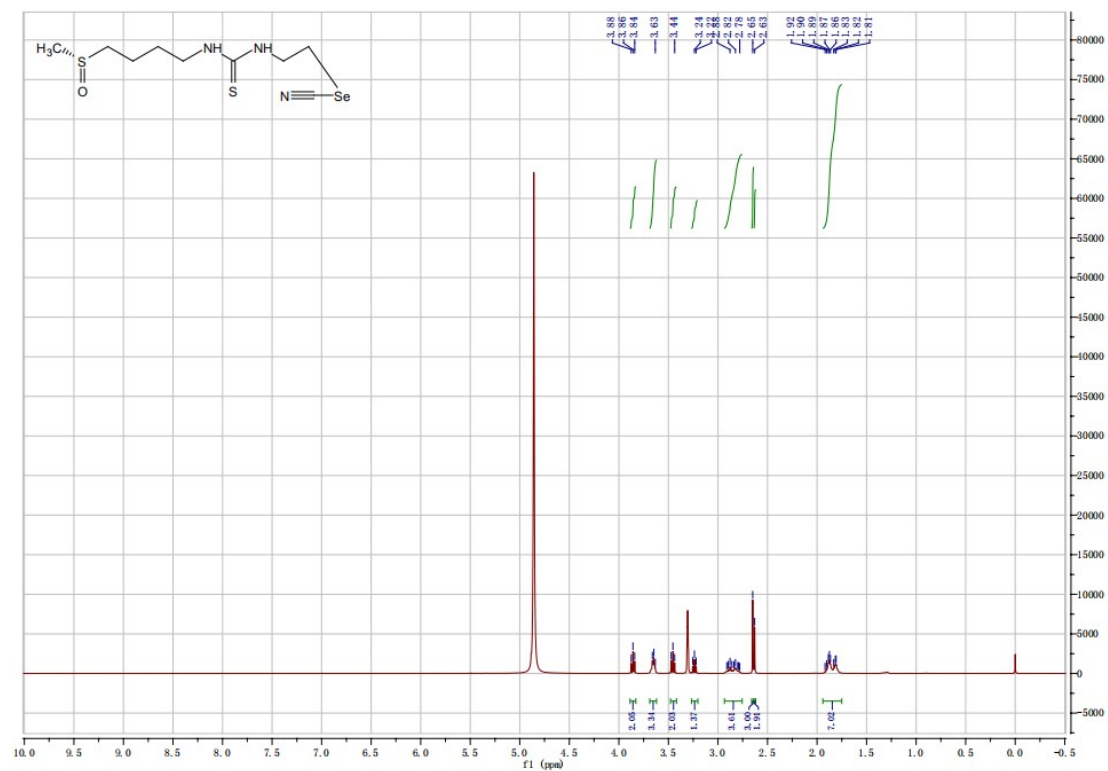

Figure S3. <sup>13</sup>C NMR of SLL-III-9.

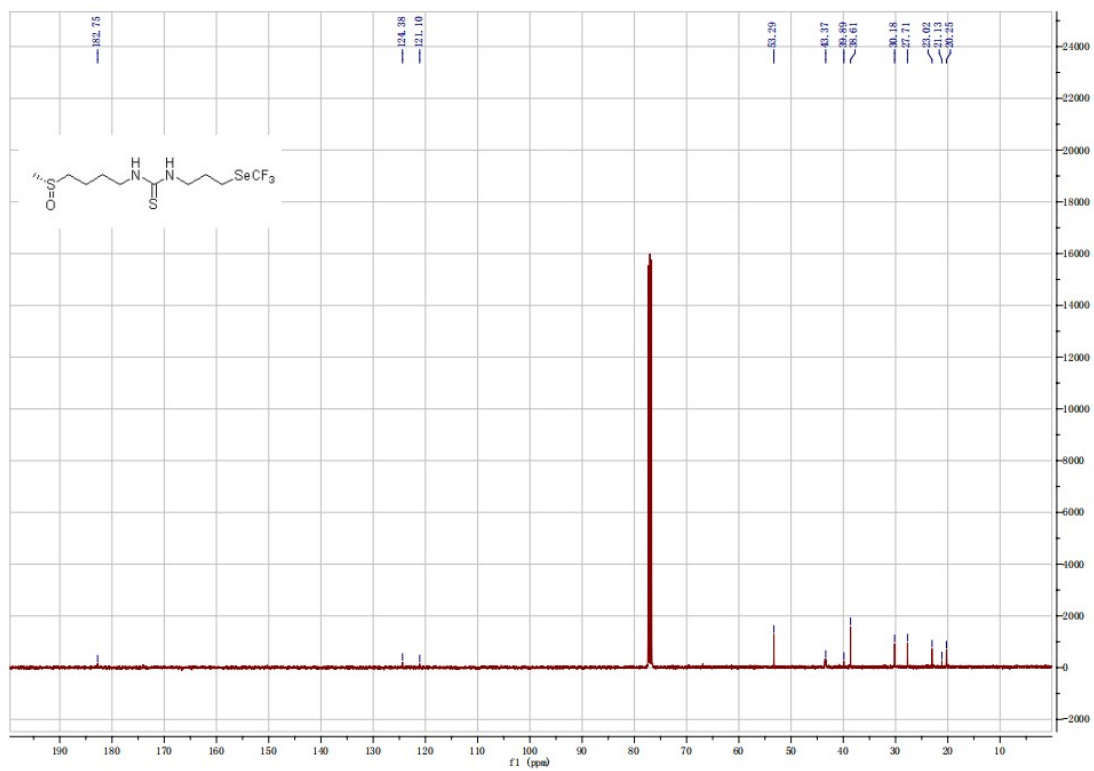

Figure S4.  $^{13}\text{C}$  NMR of SLL-III-120.

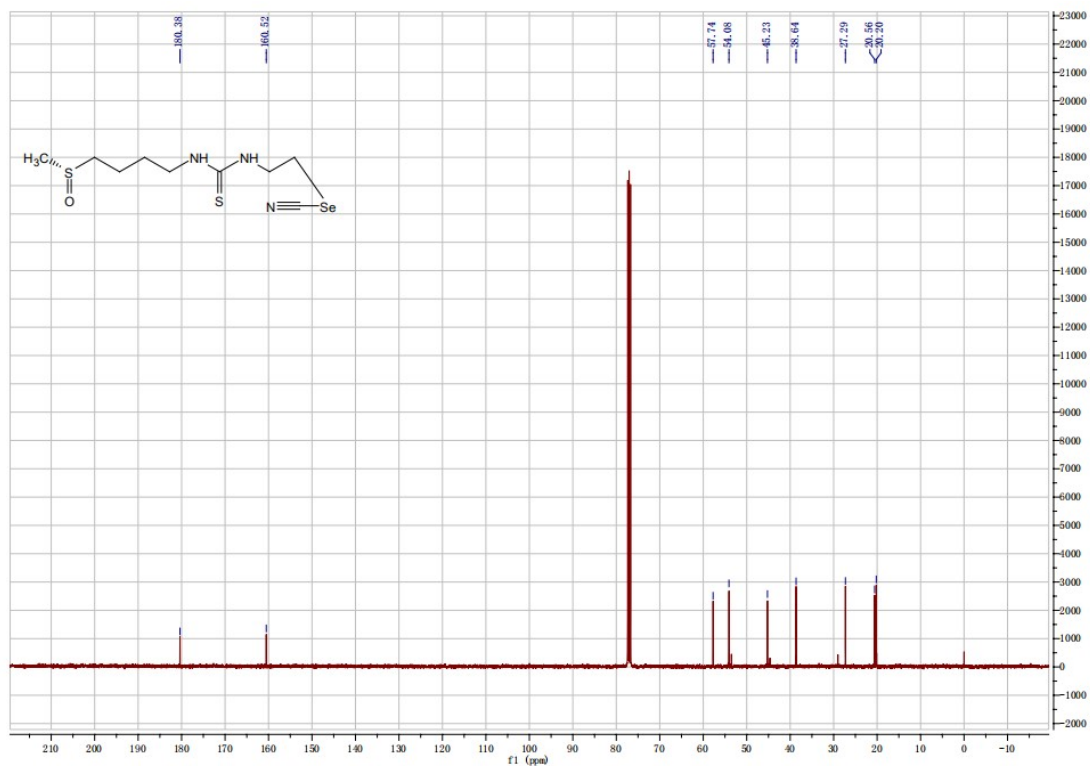

Figure S5.  $^{19}\text{F}$  NMR of SLL-III-9.

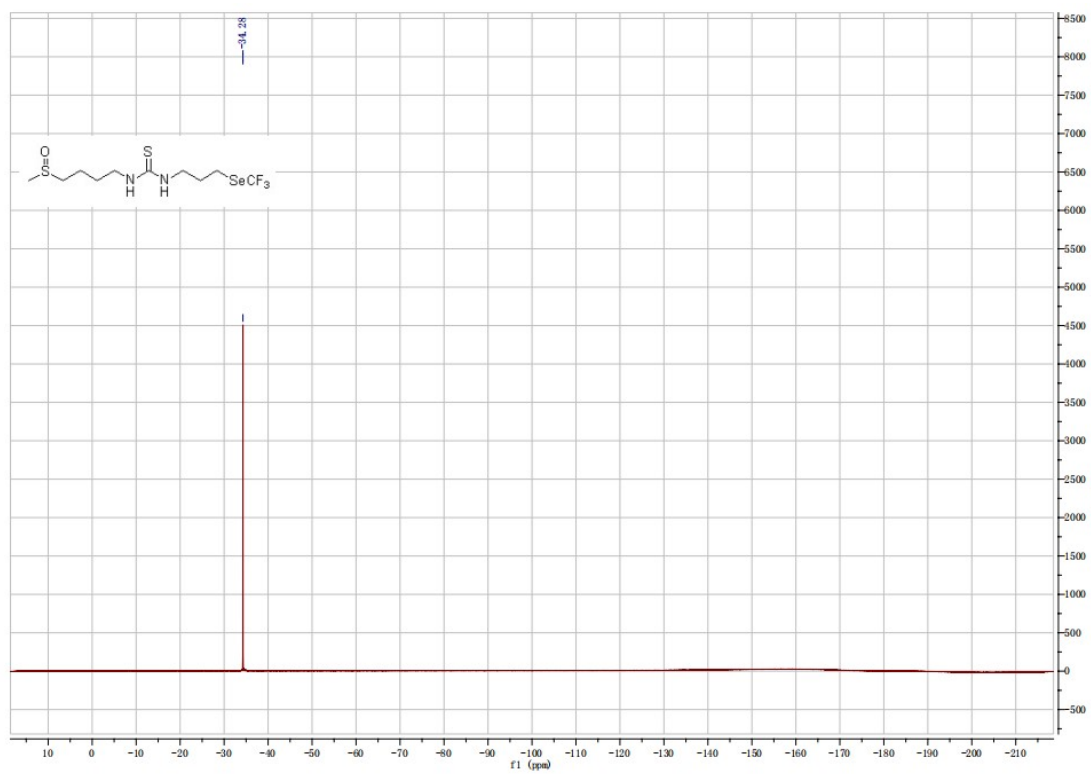

**Figure S6. MS of SLL-III-120.**

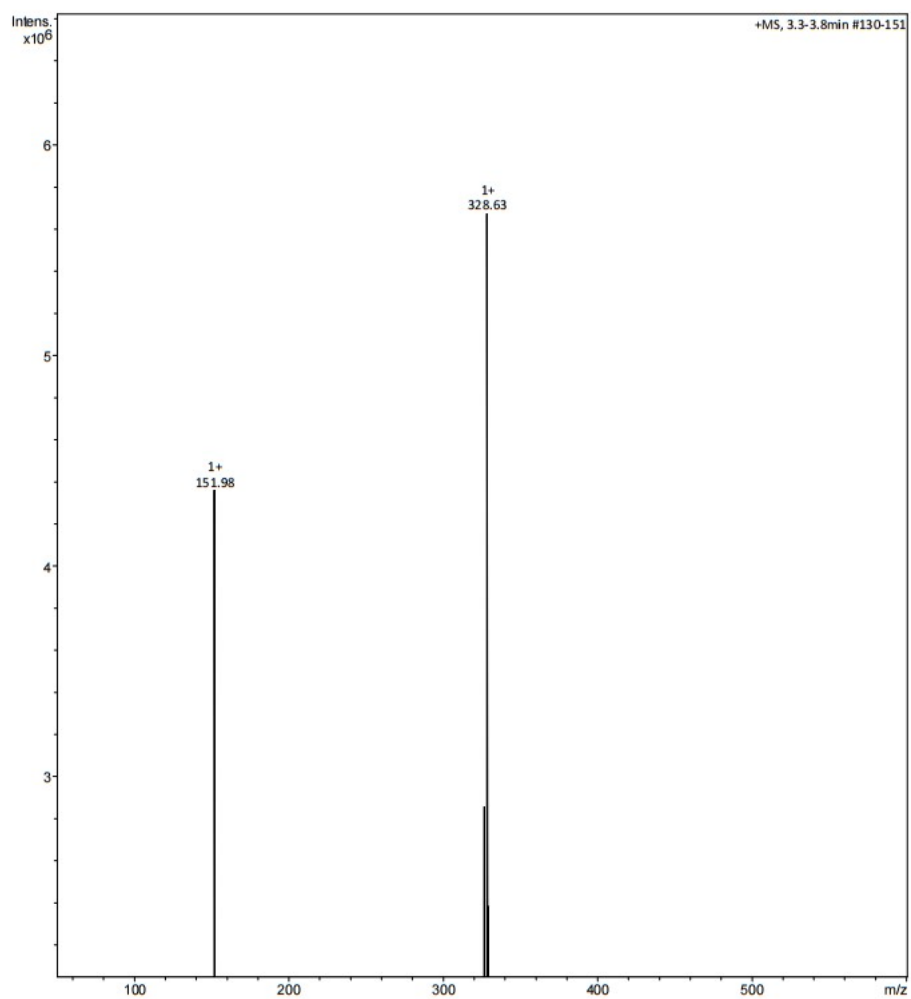



**Figure S7. A mouse model of depression was validated by behavioral experiments.**

After mice were raised in isolation and given stress stimuli for 13 weeks, depression-related indicators (A) sucrose preference test, (B) tail suspension test, and (C) forced swimming test were performed to detect the successful establishment of the depressed mouse model. \*\*P<0.01 compared to control group.

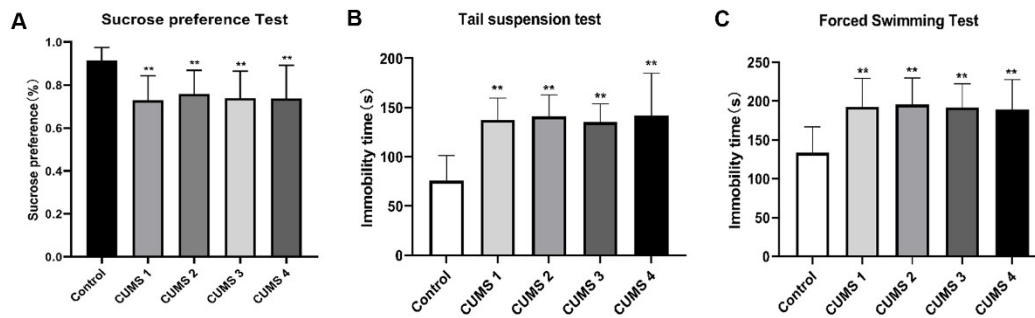

**Figure S8. The effect of different concentration of SFN, SLL-III-9, and SLL-III-120 in LPS-activated BV2 cells.** After BV2 cells were treated with 1  $\mu\text{g}/\text{mL}$  LPS for 24 h to establish neuroinflammatory cell models, different concentrations of SFN, SLL-III-9, or SLL-III-120 were added to the culture medium for 24 h. The culture medium and cells were collected, and Griess assay, MTT assay and real-time PCR was performed to analysis (A) the production of nitrate, (B) cell viability and (C) iNOS mRNA expression. \* $P < 0.05$ , \*\* $P < 0.01$ , \*\*\* $P < 0.001$  compared to the LPS group and # $P < 0.05$ , ## $P < 0.01$ , ### $P < 0.001$  compared to control group.

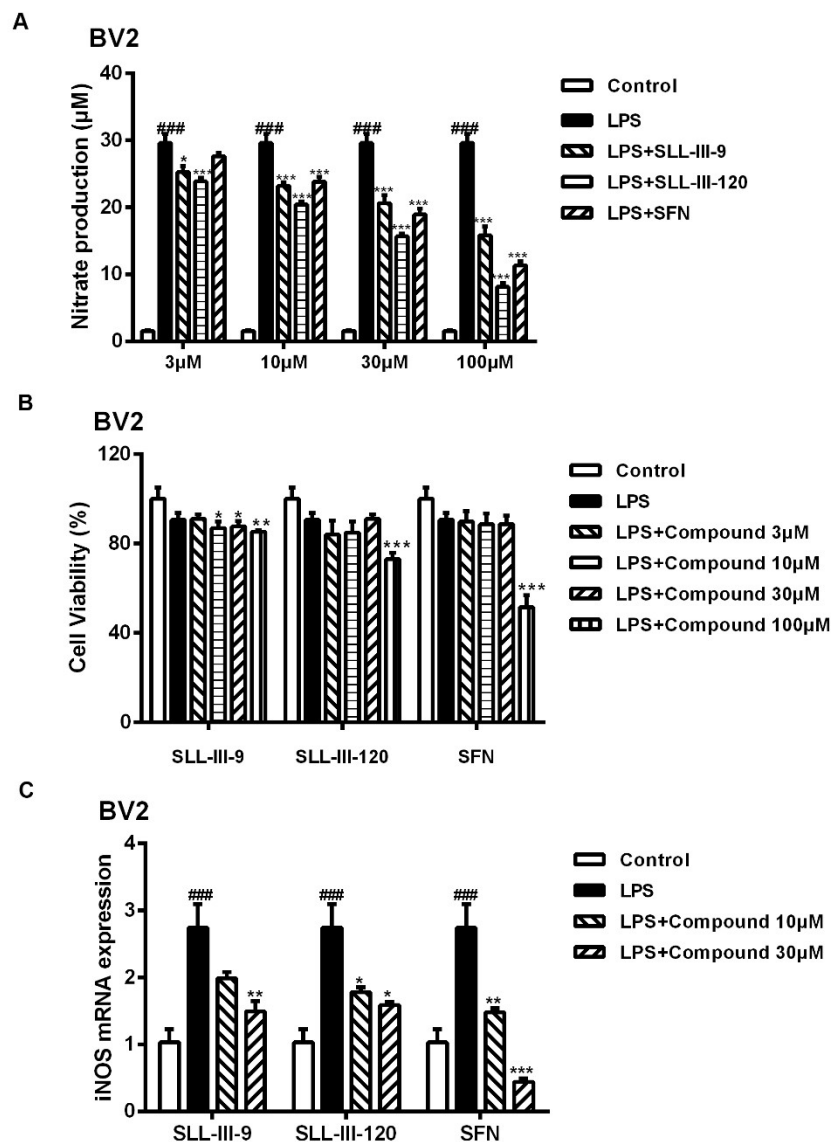

Supplement: d3fo05278h1.pdf [file d3fo05278h1.pdf]
