# Supplementary material for: Antidepressant effects of sulforaphane (SFN) and its derivatives SLL-III-9 and SLL-III-120 and their potential underlying mechanisms based on the microbiota–gut–brain axis
Source: Royal Society of Chemistry journal article supplement (doi:10.1039/d3fo05278h), 2024-01-01

Figure 5F:  
 $\beta$ -actin

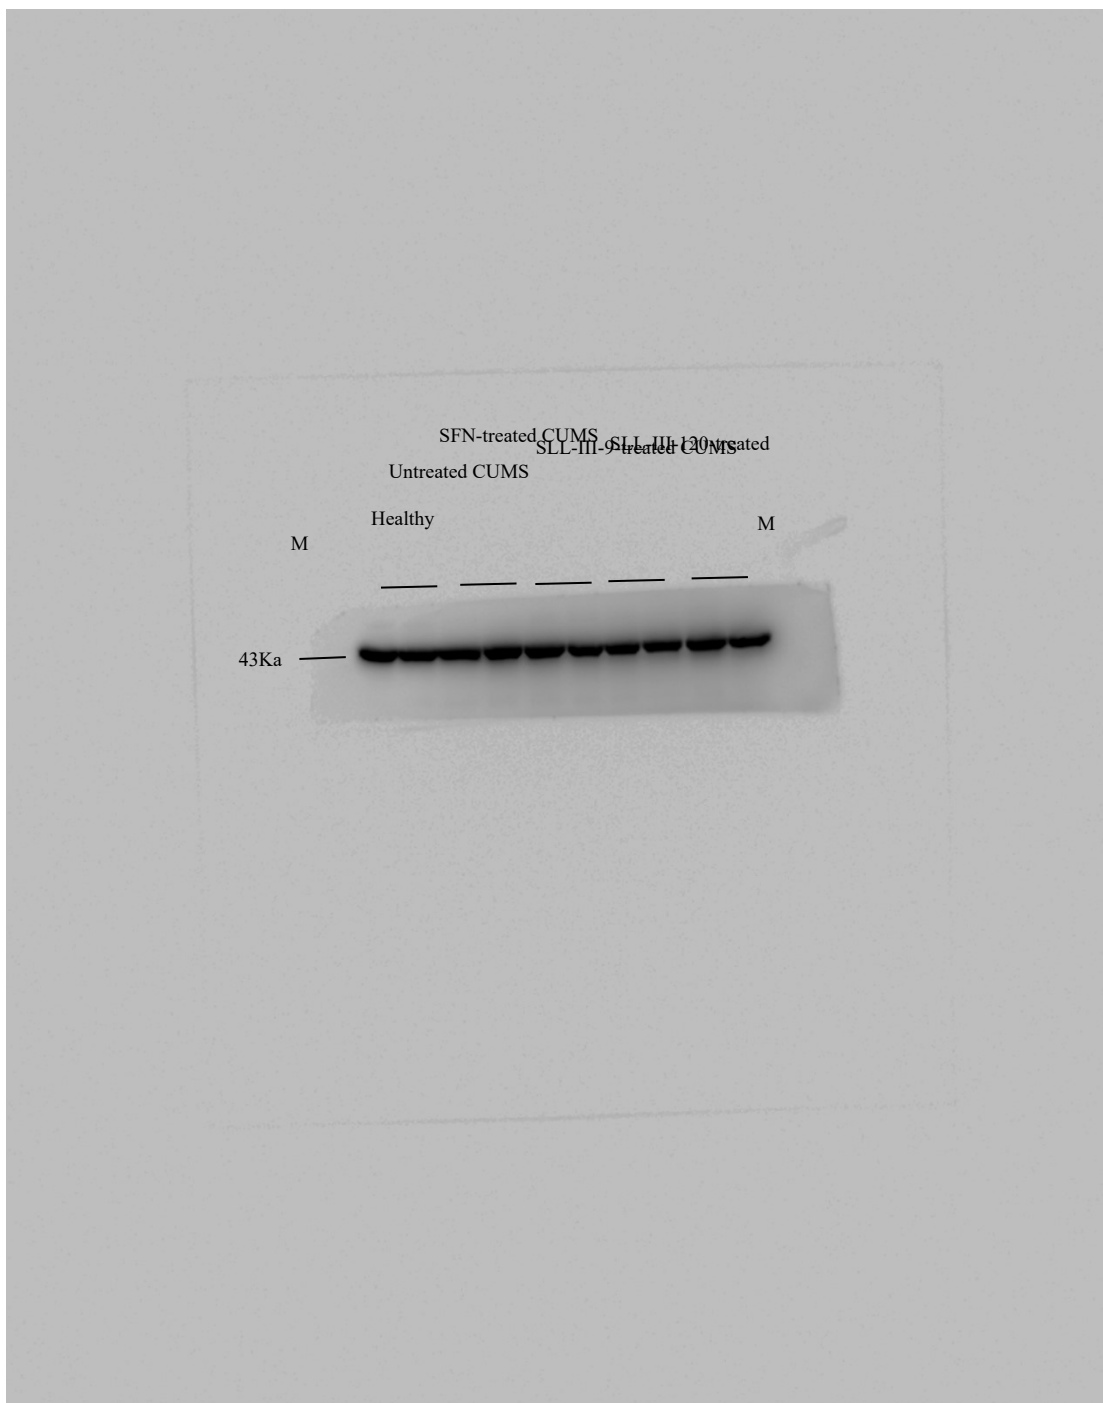

BDNF

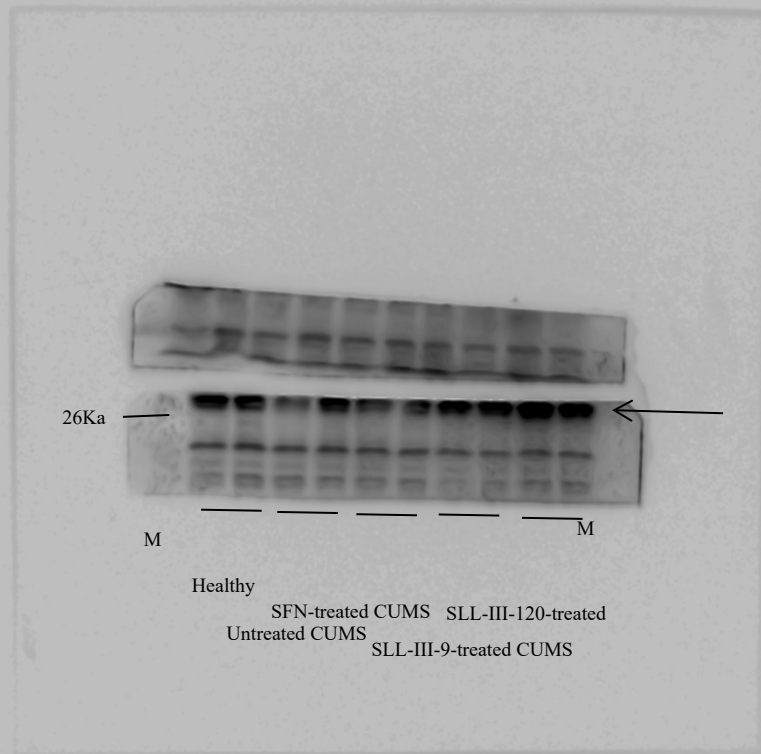

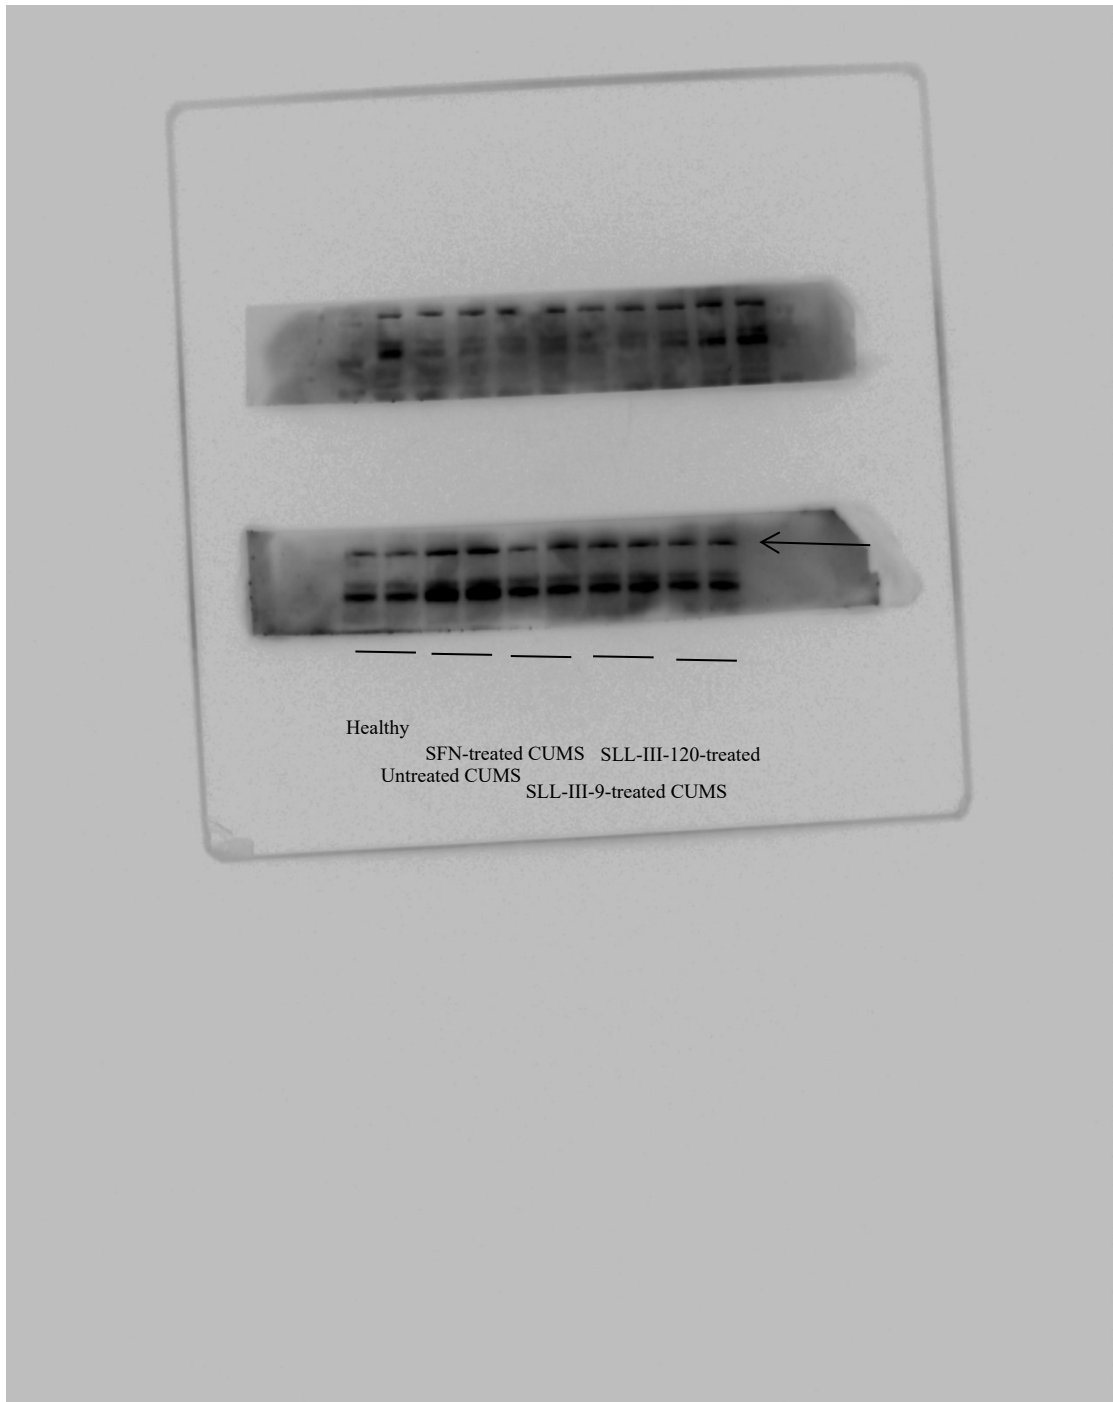

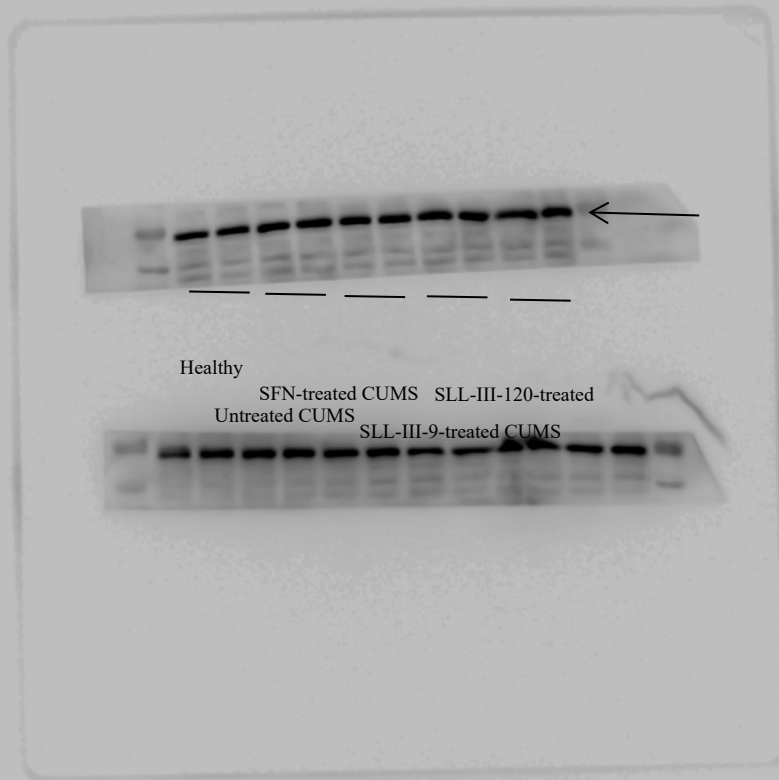

NLRP3

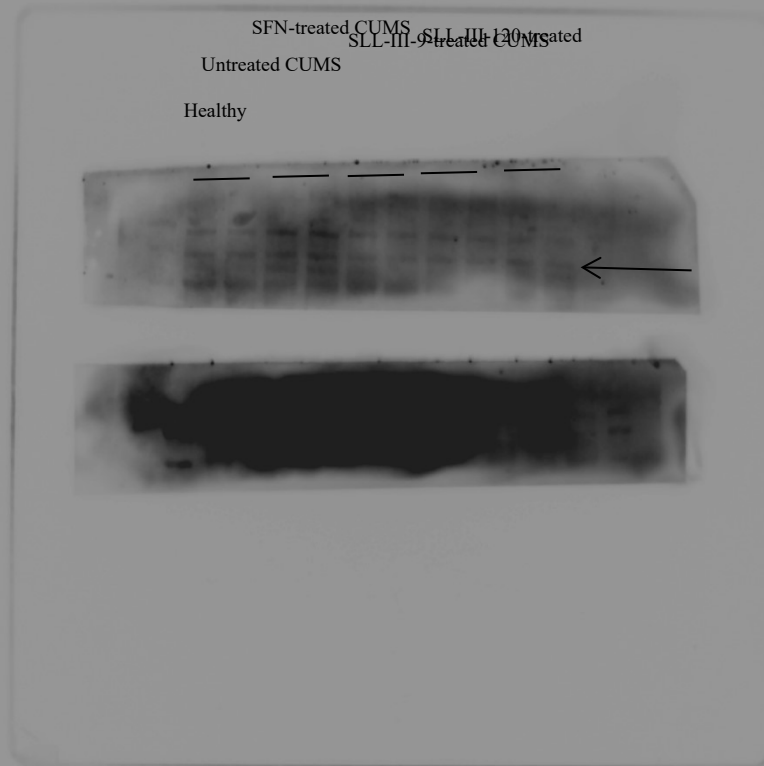

# Caspase 1

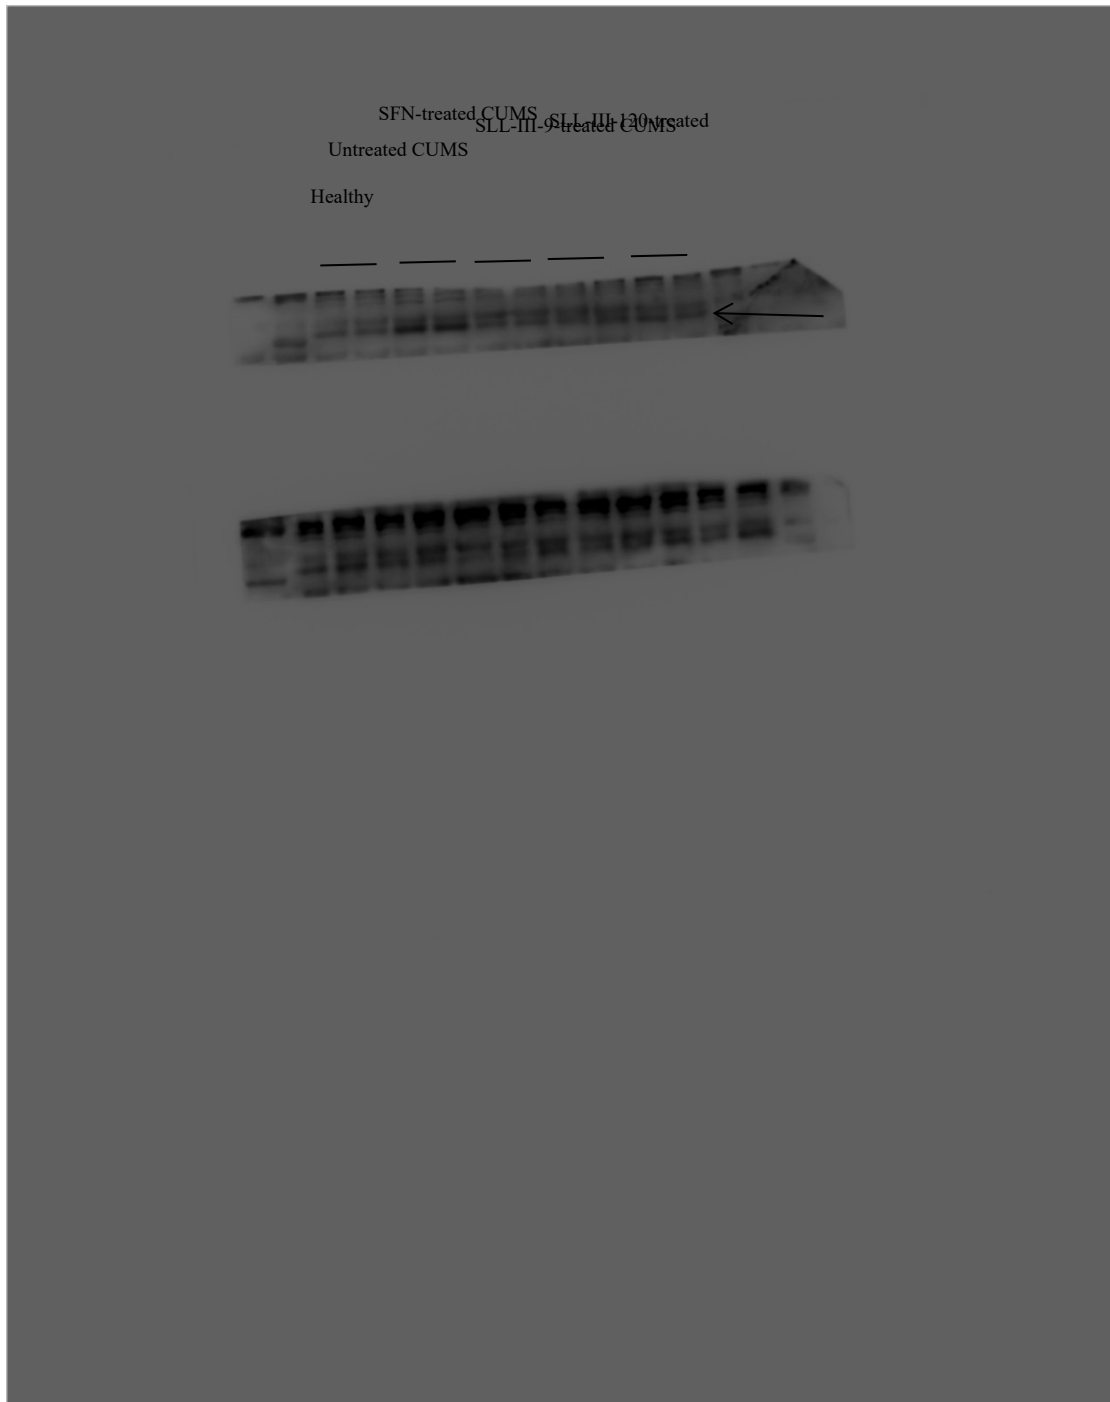

Figure 6A:  
 $\beta$ -actin

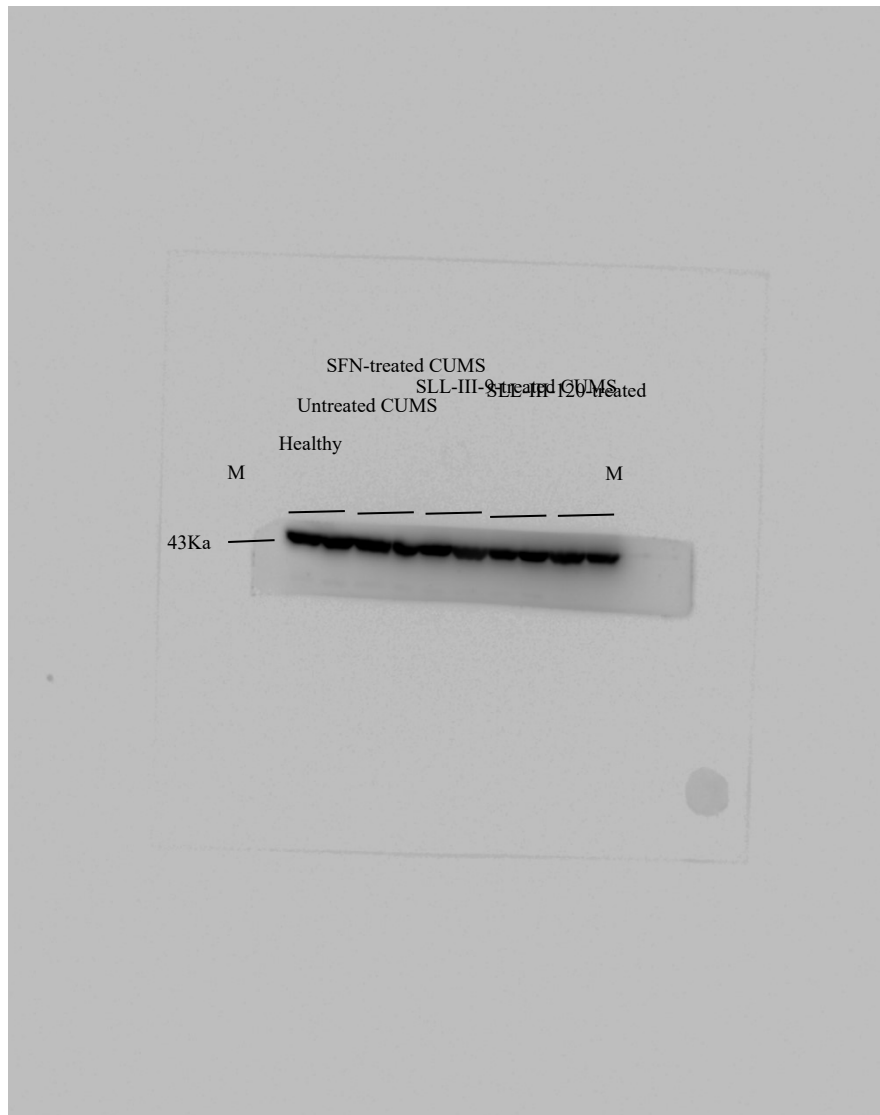

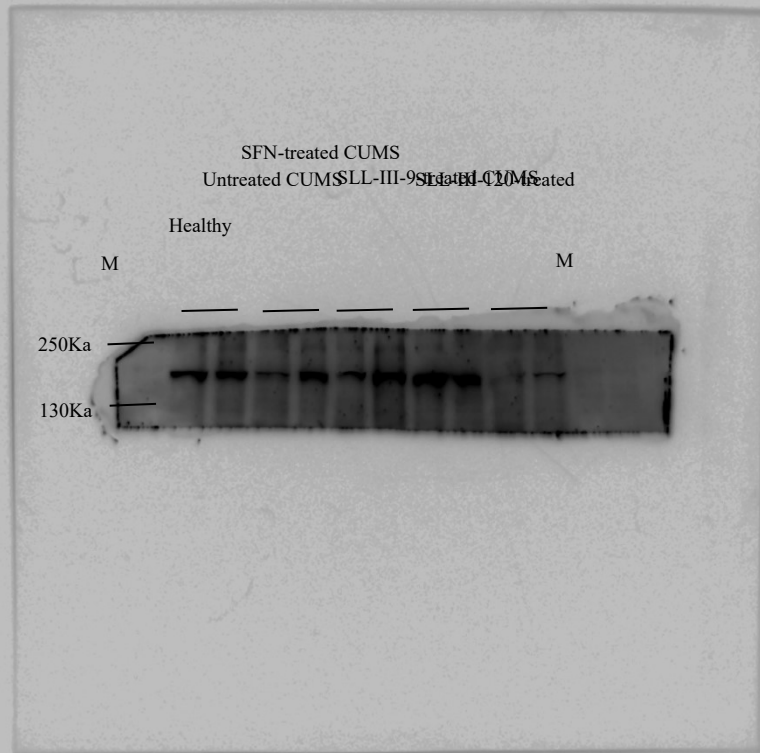



Claudin

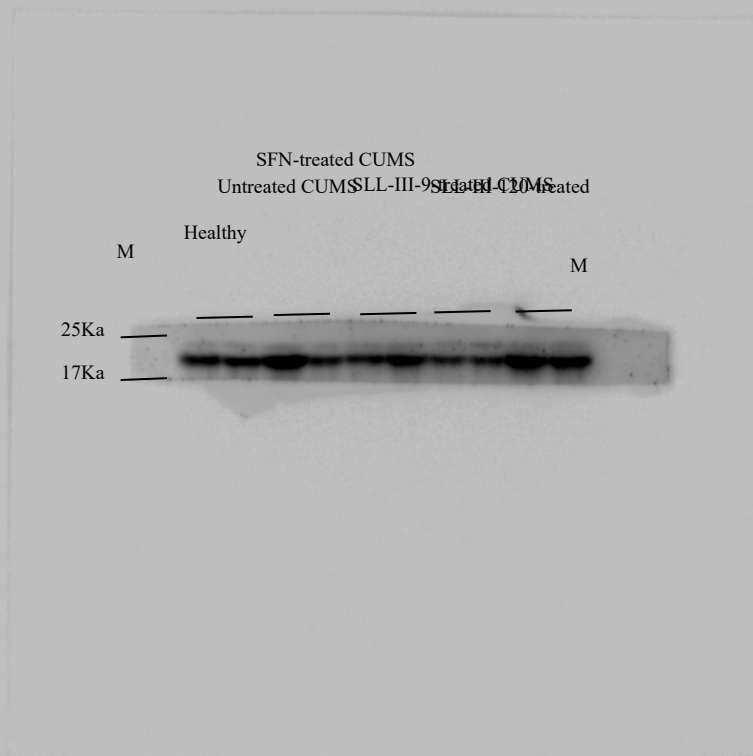

Occludin

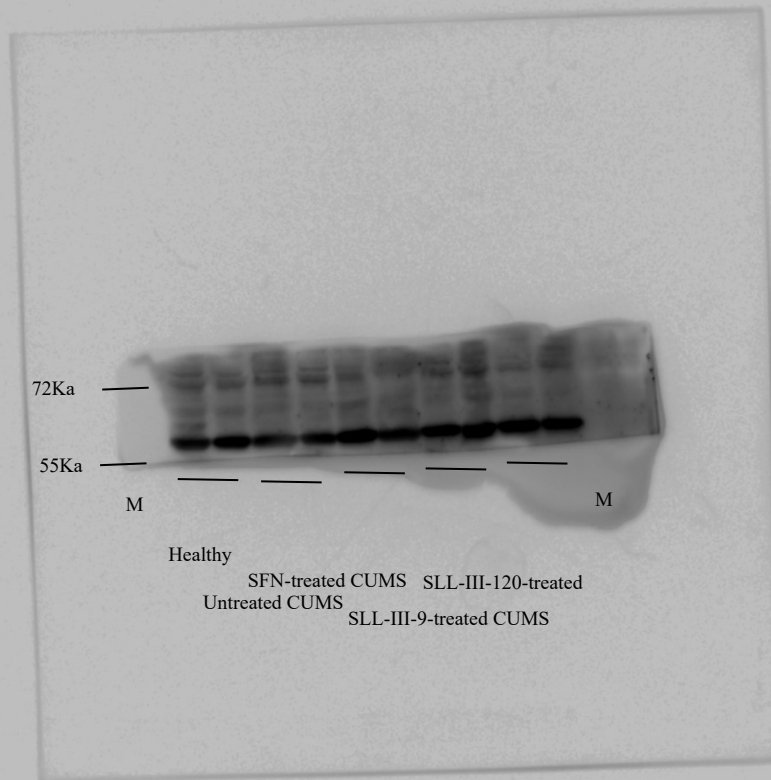

Figure 8A:  
β-actin

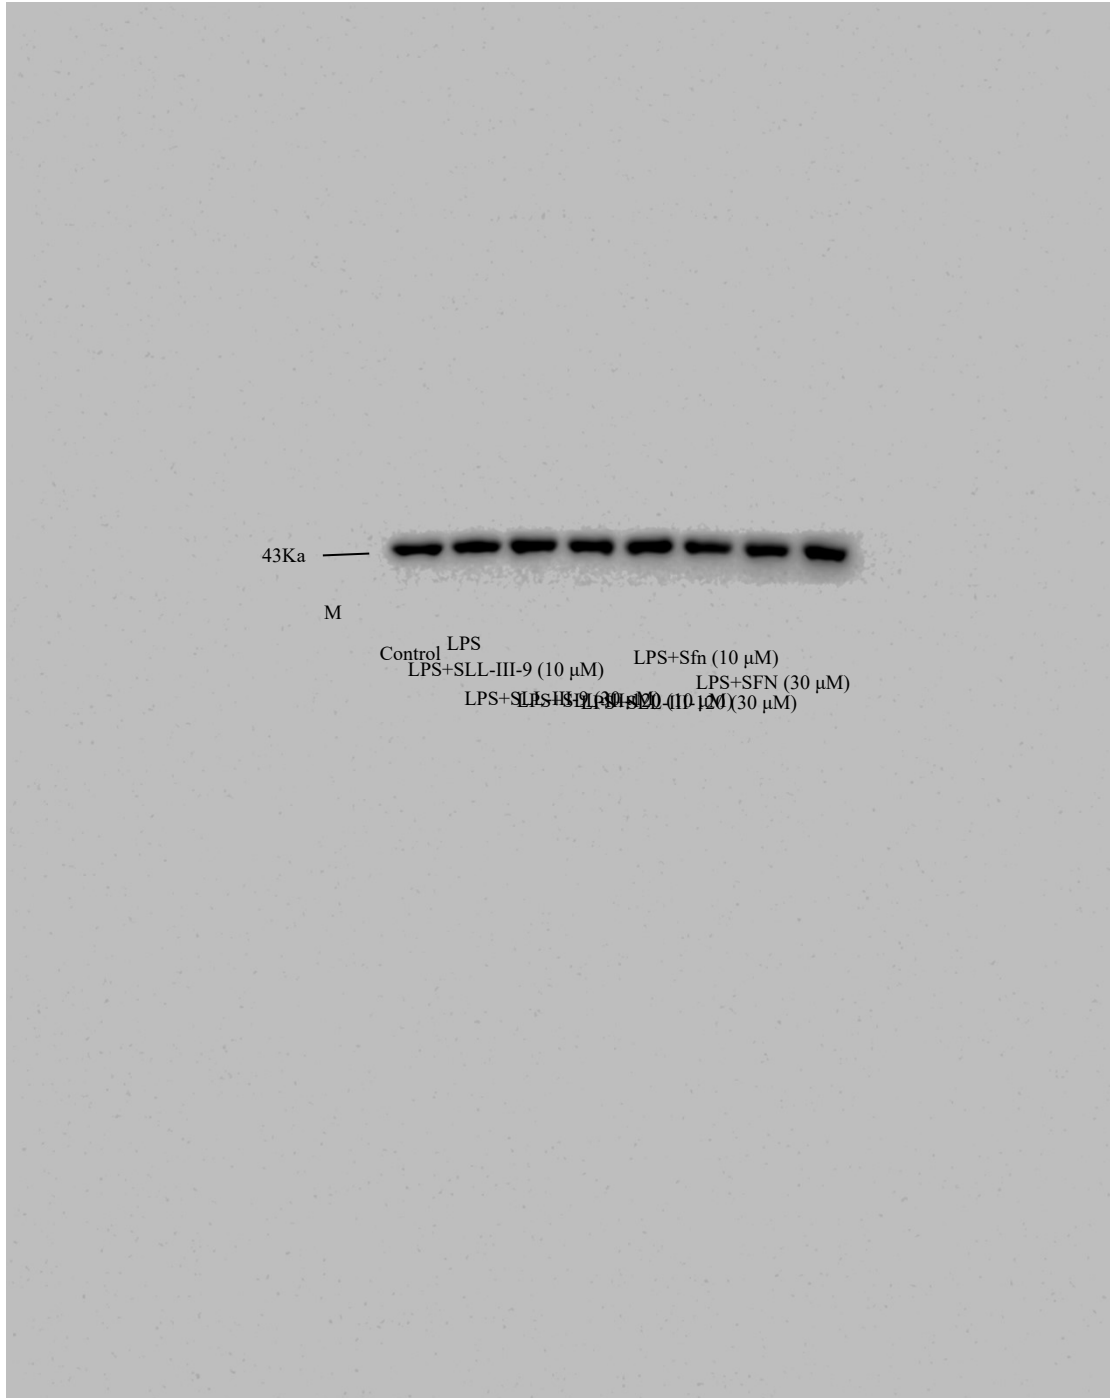

p-p65

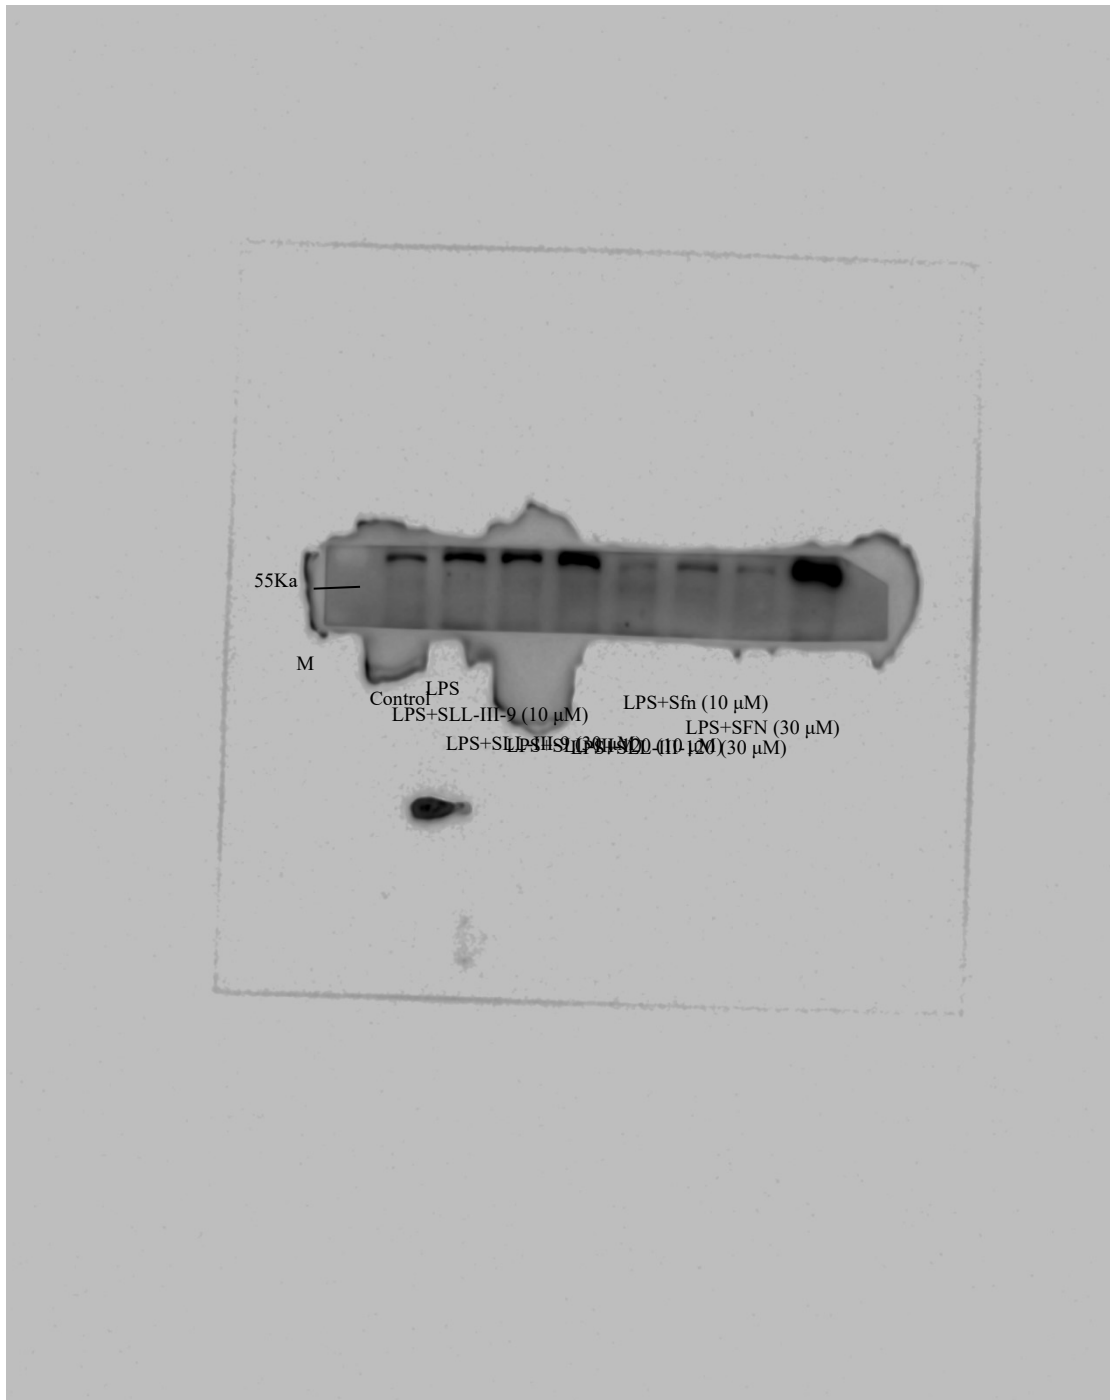

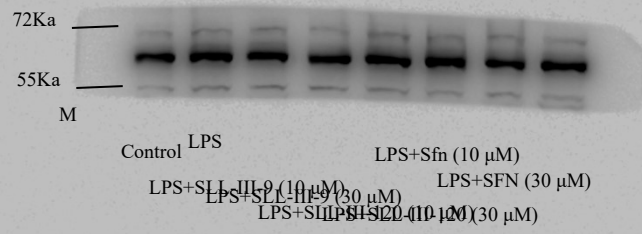

Figure 8B:  
 $\beta$ -actin

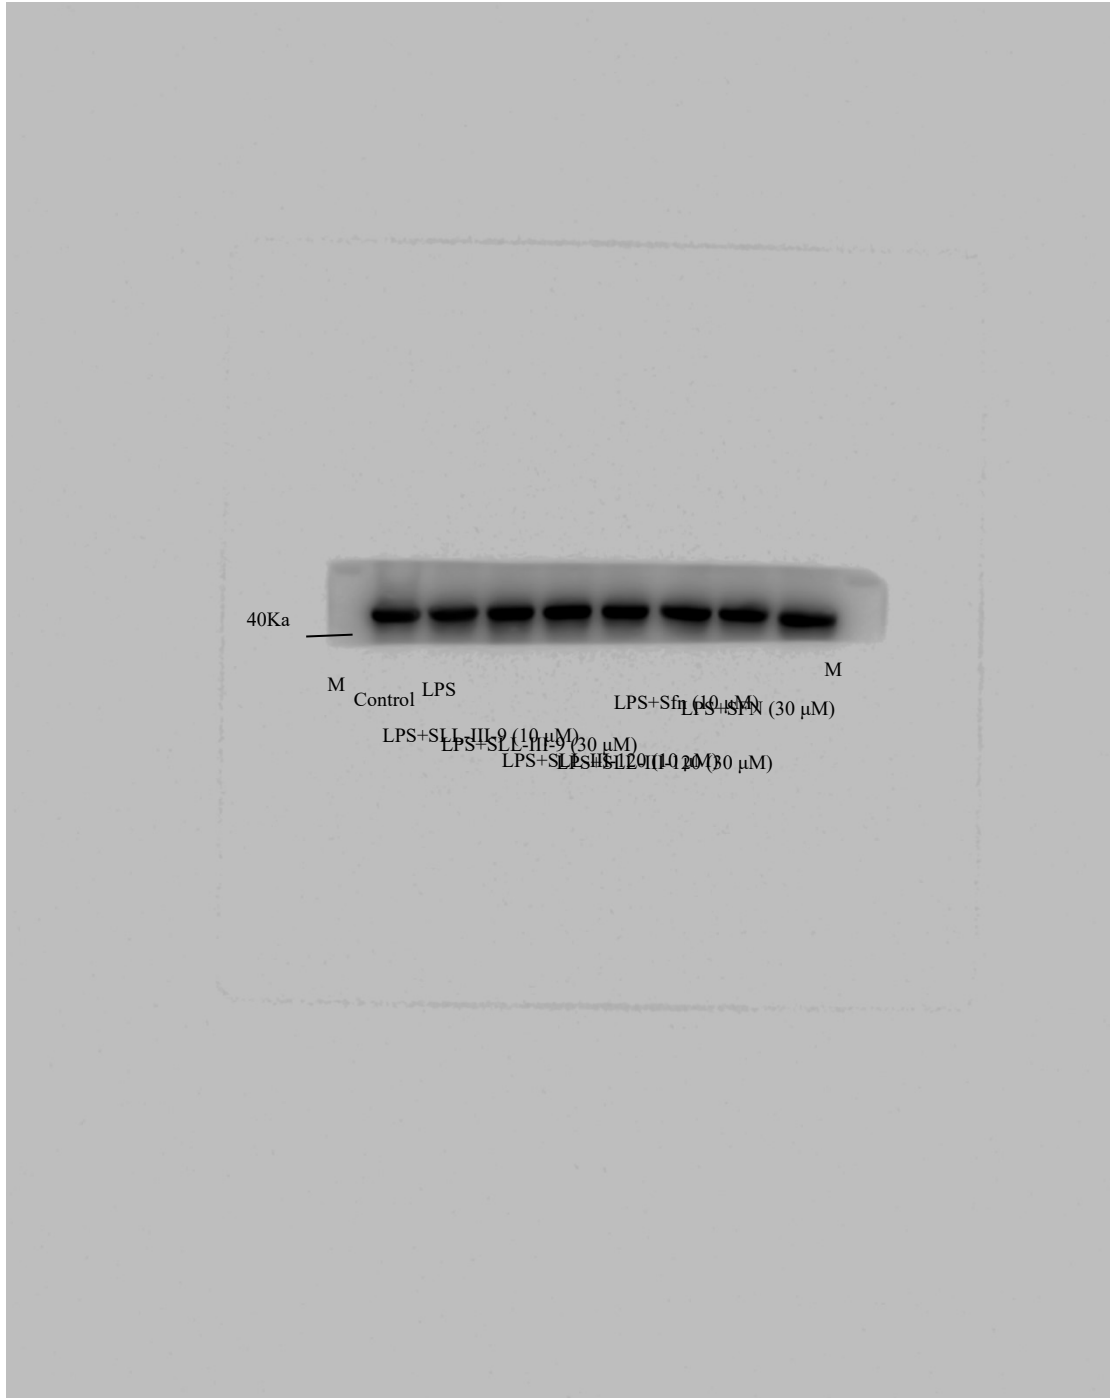

NLRP3

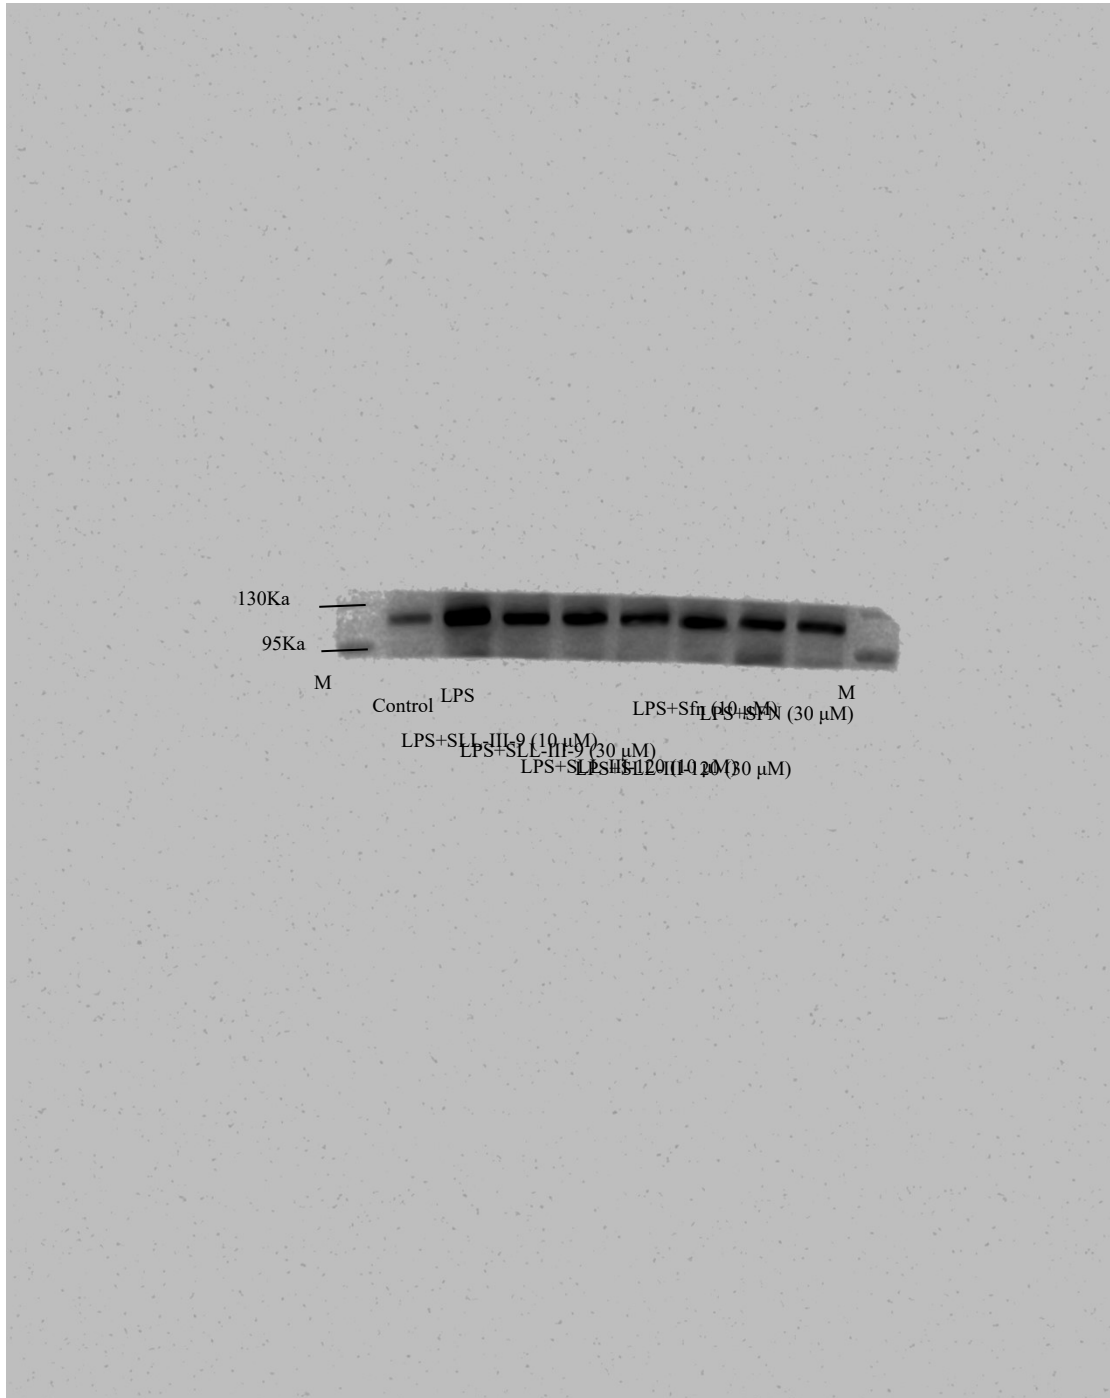

# Caspase 1

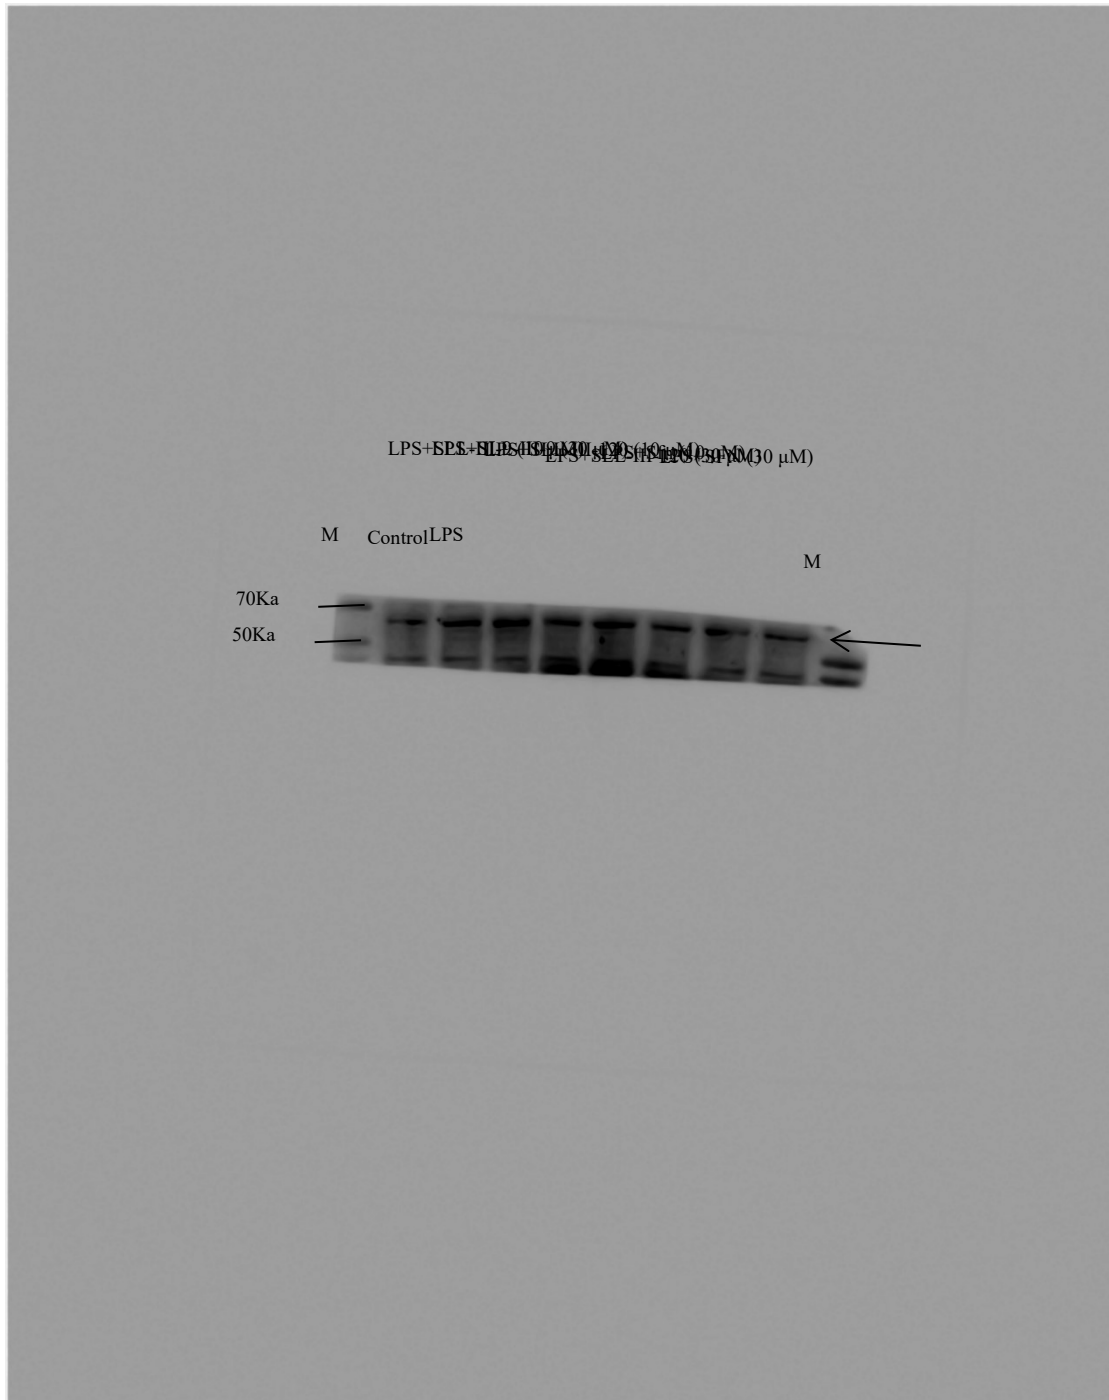

Supplement: d3fo05278h2.pdf [file d3fo05278h2.pdf]
